# Supplementary material for: Initial Right Ventricular Dysfunction Severity Identifies Severe Peripartum Cardiomyopathy Phenotype With Worse Early and Overall Outcomes: A 24‐Year Cohort Study
Source: PubMed Central journal article supplement — J Am Heart Assoc. 2018 Apr 23;7(9):e008378. doi: 10.1161/JAHA.117.008378 (PMC6015280; doi:10.1161/jaha.117.008378), 2018-04-23
Supplement: JAH3-7-e008378-s001.pdf [file JAH3-7-e008378-s001.pdf]

# **SUPPLEMENTAL MATERIAL**

**Table S1. Cardiovascular Hemodynamics of Echocardiographic RVD Severity****Subgroups.**

| <b>Hemodynamic Parameters<br/>median (IQR)</b> | <b>None-Mild RVD<br/>N=6</b> | <b>Mod-Sev RVD<br/>N=15</b> | <b>p-value</b> |
|------------------------------------------------|------------------------------|-----------------------------|----------------|
| mRA, mmHg                                      | 5 (2-5)                      | 15 (11-20)                  | 0.003          |
| RVSP, mmHg                                     | 32 (23-48)                   | 50 (38-56)                  | 0.039          |
| RVEDP, mmHg                                    | 9 (4-10)                     | 17 (12-26)                  | 0.008          |
| PASP, mmHg                                     | 34 (23-48)                   | 50 (44-56)                  | 0.019          |
| PADP, mmHg                                     | 19 (10-23)                   | 25 (22-30)                  | 0.016          |
| mPA, mmHg                                      | 22 (13-31)                   | 36 (30-41)                  | 0.014          |
| mPCWP, mmHg                                    | 13 (9-15)                    | 25 (17-30)                  | 0.016          |
| DPG, mmHg                                      | 4 (1-8)                      | 2 (0-6)                     | 0.348          |
| PVR, Wood Units                                | 2.2 (1.2-3.1)                | 3.2 (1.6-4.6)               | 0.276          |
| CO, L/min                                      | 6.0 (4.5-6.9)                | 3.7 (2.6-4.2)               | 0.024          |
| CI, L/min/m <sup>2</sup>                       | 3.3 (2.0-4.0)                | 2 (1.6-2.6)                 | 0.056          |
| RA:PCWP                                        | 0.40 (0.33-0.56)             | 0.69 (0.49-0.91)            | 0.173          |
| SVI:RA                                         | 11 (10.2-22.2)               | 1.5 (0.82-2.9)              | 0.012          |
| PAPi                                           | 4.2 (2.6-6.0)                | 1.4 (1.1-2.5)               | 0.009          |

RVD, right ventricular dysfunction; mRA, mean right atrial pressure; RVSP, right ventricular systolic pressure; RVEDP, right ventricular end-diastolic pressure; PASP, pulmonary artery systolic pressure; PADP, pulmonary artery diastolic pressure; mPA, mean pulmonary artery pressure; mPCWP, mean pulmonary capillary wedge pressure; DPG, diastolic pulmonary gradient; PVR, pulmonary vascular resistance; CO, cardiac output; CI, cardiac index; SVI, stroke volume index; PAPi, pulmonary artery pulsatility index.
